# Supplementary material for: Virulence of the Melioidosis Pathogen Burkholderia pseudomallei Requires the Oxidoreductase Membrane Protein DsbB
Source: PubMed Central journal article supplement (PMC5913862; doi:10.1128/iai.00938-17), 2018-04-23
Supplement: IAI.00938-17_zii999092380s1.pdf [file IAI.00938-17_zii999092380s1.pdf]

(A)

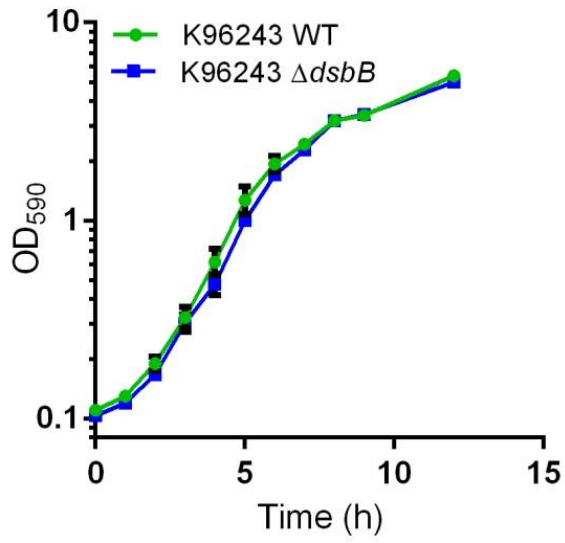

(B)

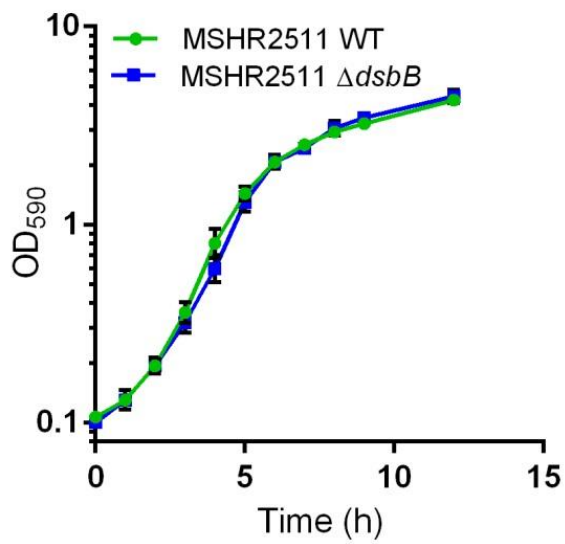

(C)

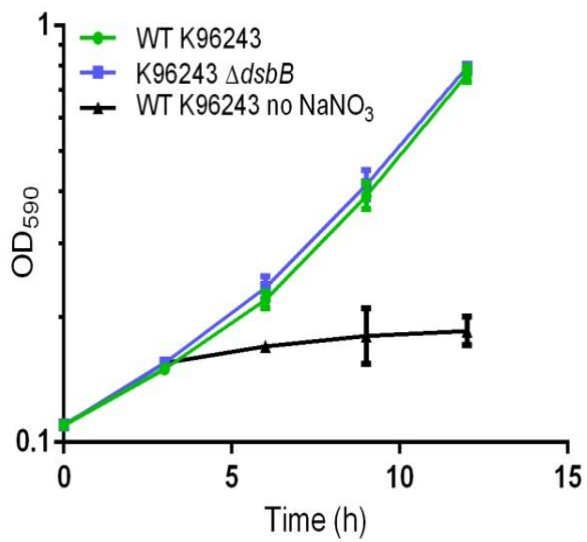

**Fig S1. Growth characteristics of *B. pseudomallei* strains grown aerobically (A, B) or (C) anaerobically.** No difference in aerobic growth was observed between *B. pseudomallei* WT and  $\Delta dsbB$  for strains K96243 or MSHR2511 (P 0.32 and P 0.67 respectively) (N=3). Growth of *B. pseudomallei* in the absence of oxygen not differ over the time course (P 0.18) (N=2) as determined by two way ANOVA. Error bars represent standard error of the mean.
